# Supplementary material for: Essential Oils Encapsulated in Zeolite Structures as Delivery Systems (EODS): An Overview
Source: MDPI journal article supplement (doi:10.3390/molecules27238525), 2022-12-03
Supplement: s1 [file s1]

# Essential Oils Encapsulated in Zeolite Structures as Delivery Systems (EODS): An Overview

Alexandra P. Ferreira <sup>1,2,3</sup>, Cristina Almeida-Aguiar <sup>2,\*</sup>, Susana P. G. Costa <sup>1,\*</sup> and Isabel C. Neves <sup>1,3,4,\*</sup>

<sup>1</sup> CQUM—Centre of Chemistry, Chemistry Department, University of Minho, 4710-057 Braga, Portugal

<sup>2</sup> CBMA—Centre of Molecular and Environmental Biology, Department of Biology, University of Minho, 4710-057 Braga, Portugal

<sup>3</sup> CEB—Centre of Biological Engineering, University of Minho, 4710-057 Braga, Portugal

<sup>4</sup> LABBELS—Associate Laboratory, 4710-057 Braga, Guimarães, Portugal

\* Correspondence: cristina.aguiar@bio.uminho.pt (C.A.-A.); spc@quimica.uminho.pt (S.P.G.C.); ineves@quimica.uminho.pt (I.C.N.)

**Table S1.** Mechanisms of action of some EO against fungi

| Plant source of EO            |              | Target microorganism                                        | Mechanism of action                                                                                                             | References |
|-------------------------------|--------------|-------------------------------------------------------------|---------------------------------------------------------------------------------------------------------------------------------|------------|
| scientific name               | common name  |                                                             |                                                                                                                                 |            |
| <i>Coriaria nepalensis</i>    | Tannery tree | <i>Candida albicans</i>                                     | Inhibition of ergosterol bio-synthesis and membrane in-tegrity disturbance                                                      | [1]        |
|                               |              | <i>Candida glabrata</i>                                     |                                                                                                                                 |            |
|                               |              | <i>Candida parapsilosis</i>                                 |                                                                                                                                 |            |
|                               |              | <i>Candida krusei</i>                                       |                                                                                                                                 |            |
| <i>Curcuma longa</i>          | Turmeric     | <i>Aspergillus flavus</i>                                   | Inhibition of ergosterol biosynthesis                                                                                           |            |
| <i>Melaleuca alternifolia</i> | Tea tree     | <i>Candida albicans</i>                                     | Glucose-dependent external media acidification; Permea-bility and membrane fluidity change                                      |            |
|                               |              | <i>Candida glabrata</i>                                     | Glucose-dependent external media acidification                                                                                  |            |
|                               |              | <i>Saccharomyces cerevisiae</i>                             |                                                                                                                                 |            |
| <i>Thymus vulgaris</i>        | Thyme        | <i>Aspergillus flavus</i><br><i>Aspergillus parasiticus</i> | Reduction of mycelium growth and sporulation in-hibition                                                                        | [2]        |
| <i>Origanum vulgare</i>       | Oregano      |                                                             |                                                                                                                                 |            |
| <i>Eucalyptus globulus</i>    | Eucalyptus   | <i>Mucor hiemalis</i>                                       | Effect on degradative and enzymatic ability                                                                                     | [3]        |
|                               |              | <i>Penicillium glabrum</i>                                  |                                                                                                                                 |            |
|                               |              | <i>Fusarium roseum</i>                                      |                                                                                                                                 |            |
| <i>Mentha piperita</i>        | Mint         | <i>Candida albicans</i>                                     | Reduction of ergosterol pro-duction, induction of intra-cellular acidification, mor-phological changes, and membrane disruption | [4]        |

**Table S2.** Synergic, additive or antagonistic interactions between EO components

| Combined EO components        | Microorganism                                      | Method used to study interactions | Interaction            | References |
|-------------------------------|----------------------------------------------------|-----------------------------------|------------------------|------------|
| Thymol/<br>Carvacrol          | <i>Staphylococcus aureus</i>                       | Half dilution                     | Additive               |            |
|                               | <i>Pseudomonas aeruginosa</i>                      |                                   |                        |            |
|                               | <i>Escherichia coli</i>                            | Checkerboard                      | Synergism/<br>Additive |            |
|                               | <i>Staphylococcus aureus</i>                       |                                   | Antagonism             |            |
|                               | <i>Escherichia coli</i>                            |                                   |                        |            |
|                               | <i>Staphylococcus aureus</i>                       | Mixture                           | Additive               |            |
|                               | <i>Pseudomonas aeruginosa</i>                      |                                   |                        |            |
| Thymol/ Eugenol               | <i>Escherichia coli</i>                            | Checkerboard                      | Synergism              |            |
| Carvacrol/<br>Eugenol         | <i>Escherichia coli</i>                            | Checkerboard                      | Synergism              |            |
|                               | <i>Staphylococcus aureus</i>                       |                                   | Antagonism             |            |
|                               | <i>Bacillus cereus</i>                             |                                   |                        |            |
|                               | <i>Escherichia coli</i>                            |                                   |                        |            |
|                               | Carvacrol/<br>Linalool                             | <i>Listeria monocytogenes</i>     | Checkerboard           | Synergism  |
| Cinnamaldehyde/<br>Carvacrol  | <i>Escherichia coli</i>                            | Checkerboard                      | Additive               | [5]        |
| Cinnamaldehyde/<br>Thymol     | <i>Escherichia coli</i>                            | Checkerboard                      | Synergism              |            |
|                               | <i>Salmonella typhimurium</i>                      | Mixture                           |                        |            |
| Cinnamaldehyde/<br>Eugenol    | <i>Staphylococcus</i> sp.                          | Mixture                           | Additive               |            |
|                               | <i>Micrococcus</i> sp.                             |                                   |                        |            |
|                               | <i>Enterobacter</i> sp.                            |                                   |                        |            |
| Limonene/<br>1,8-cineole      | <i>Staphylococcus aureus</i>                       | Mixture                           | Synergism              |            |
|                               | <i>Pseudomonas aeruginosa</i>                      |                                   |                        |            |
| 1,8-cineole/<br>Aromadendrene | Methicillin-resistant <i>Staphylococcus aureus</i> | Checkerboard                      | Additive               |            |
|                               | Vancomycin-resistant <i>Enterococci</i>            |                                   |                        |            |
|                               | <i>Enterococcus faecalis</i>                       |                                   |                        |            |
| Carvacrol/ Thymol             | <i>Aspergillus flavus</i>                          | Mixture                           | Synergism              | [6]        |
|                               | <i>Aspergillus alternata</i>                       |                                   |                        |            |
|                               | <i>Penicillium</i> sp.                             |                                   |                        |            |
|                               | <i>Fusarium</i> spp.                               |                                   |                        |            |
| Ascaridole/<br>Carvacrol      | <i>Leishmania amazonensis</i>                      | Mixture                           | Synergism              | [7]        |
| Carvacrol/<br>Cinnamaldehyde  | <i>Escherichia coli</i>                            | Mixture                           | Synergism              | [8]        |
|                               | <i>Listeria innocua</i>                            |                                   |                        |            |

Note: In the checkerboard method, compounds are combined in various proportions and added to a matrix divided in sections, such as microtiter plates, to determine the fractional inhibitory concentration or the effect of the combination index of each compound. The mixture method requires the comparison between experimental data and reference values in which synergism, antagonism or additive interactions are absent.

Table S3. EO and antimicrobial drugs interactions

| Microorganism                 | Plant source of EO (scientific name) | Antibiotic/ Antifungal | Effect                                     | References |
|-------------------------------|--------------------------------------|------------------------|--------------------------------------------|------------|
| <i>Staphylococcus aureus</i>  | <i>Foeniculum vulgare</i>            | Cefoxitin              | Enhancement of inhibition zone             | [9]        |
|                               |                                      | Mupirocin              |                                            |            |
|                               |                                      | Cotrimoxazole          |                                            |            |
|                               |                                      | Ciprofloxacin          |                                            |            |
| <i>Staphylococcus aureus</i>  | <i>Eugenia uniflora</i>              | Amikacin               | Sinergy                                    | [10]       |
| <i>Escherichia coli</i>       |                                      |                        |                                            |            |
| <i>Escherichia coli</i>       | <i>Origanum vulgare</i>              | Penicillin             | Synergy                                    | [11]       |
| <i>Trichophyton rubrum</i>    | <i>Melaleuca alternifolia</i>        | Iitraconazole          | Synergy and MIC reduction                  | [12]       |
|                               |                                      | Ketoconazole           |                                            |            |
| <i>Trichophyton rubrum</i>    | <i>Cinnamomum verum</i>              | Fluconazole            | Synergy                                    | [13,14]    |
|                               | <i>Syzygium aromaticum</i>           |                        |                                            |            |
|                               | <i>Cymbopogon martini</i>            |                        |                                            |            |
|                               | <i>Thymus vulgaris</i>               |                        |                                            |            |
| <i>Trichophyton</i> spp.      | <i>Allium sativum</i>                | Ketoconazole           | Synergy                                    | [15]       |
| <i>Pseudomonas aeruginosa</i> | <i>Prunus armeniaca</i>              | Ciprofloxacin          |                                            |            |
| <i>Candida albicans</i>       | <i>Laurus nobilis</i>                | Fluconazole            | MIC reduction                              | [16]       |
| <i>Candida glabrata</i>       |                                      |                        |                                            |            |
| <i>Escherichia coli</i>       | <i>Mentha spicata</i> L.             | Gentamicin             | Gentamicin susceptibility amplified by 30x | [17]       |
| <i>Candida</i> spp.           |                                      | Fluconazole            | Strong anti-candida effect                 |            |
|                               |                                      | Ketoconazole           |                                            |            |

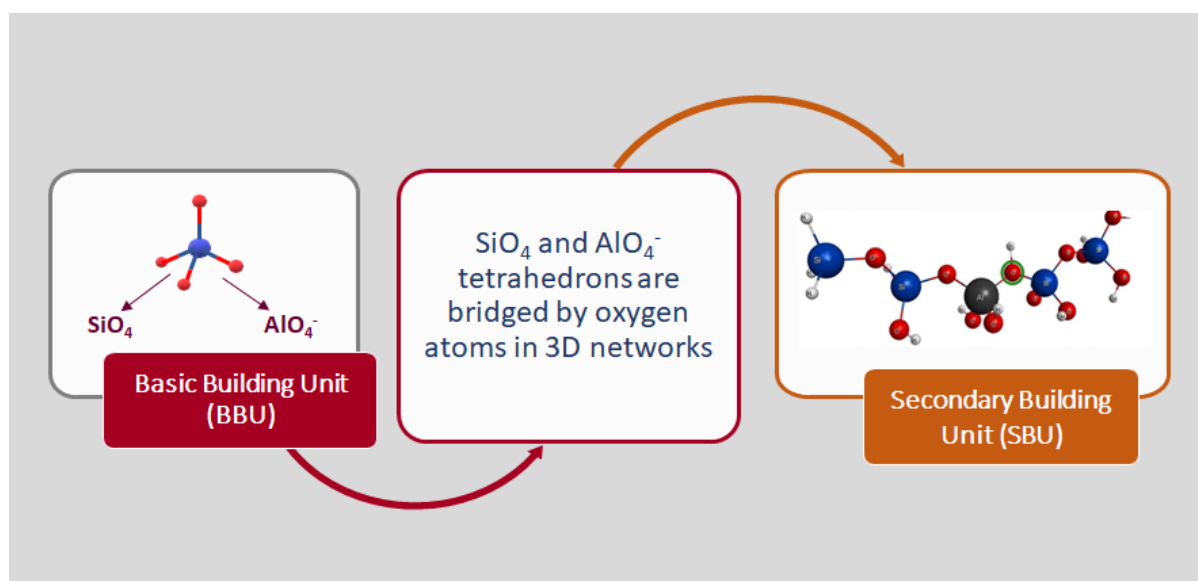

**Figure S1.** General scheme of the building pattern of zeolites' 3D framework, in which silicon atoms are color blue, oxygen atoms red, aluminum atoms black and hydrogen atoms white (adapted from [18,19]).

**Table S4.** Zeolites applicability and designated function (adapted from [19–21])

| Application                        | Function                                                                                                                   |
|------------------------------------|----------------------------------------------------------------------------------------------------------------------------|
| Construction                       | Cheap construction blocks with apparent low density, high porosity and homogenous texture                                  |
|                                    | Neutralization of excessive lime produced during concrete drying                                                           |
|                                    | Low weight insulating material                                                                                             |
| Water and residual water treatment | Ammonium extraction from municipal residual water and agriculture                                                          |
|                                    | Nitrifying bacteria growth medium                                                                                          |
|                                    | Reduction of ammonium and ammonia contents in potable water                                                                |
|                                    | Cheap and selective removal of Pb <sup>2+</sup> from potable water                                                         |
| Adsorption and Catalysis           | Drying and purification of acidic gases                                                                                    |
|                                    | Removal of water and carbon dioxide from sour natural gas                                                                  |
|                                    | Methane purification resulting from garbage decomposition                                                                  |
|                                    | Oxygen enriched air needed to hospitals, livestock and fish transport and restaurants with poor ventilation                |
| Nuclear ashes and residues         | Caesium and strontium removal from nuclear plants effluents                                                                |
|                                    | Added to <sup>90</sup> Sr and <sup>137</sup> Cs contaminated soils, caused by tests or accidents, to reduce plants' uptake |
|                                    | Added to pills and cookies to human consumption, in Bulgaria, to reduce intestinal absorption of Chernobyl's ashes         |
| Agriculture and livestock          | Poultry and swine food supplements                                                                                         |
|                                    | Absorption of rations' contaminating aflatoxins                                                                            |
|                                    | Slow release of chemical fertilizers                                                                                       |
|                                    | Soil conditioner in sandy soils and poor in clay                                                                           |
|                                    | Reduction of nitrate lixiviation in golf courses                                                                           |
|                                    | Extermination of fruit trees pests                                                                                         |
|                                    | Zeoponic substrate                                                                                                         |
| Aquaculture                        | Ammonium removal from incubator water, transports and aquariums                                                            |
|                                    | Food supplements in fish feeds                                                                                             |
| Animals' residues treatment        | Odor reduction                                                                                                             |
|                                    | Residues' humidity control                                                                                                 |
|                                    | Purification of methane gas produced                                                                                       |
| Consumer products                  | Deodorant agents for shoes, waste bins and fridges                                                                         |
|                                    | Water and ammonia removal from pets' urine                                                                                 |
|                                    | Odor reduction in barns and stables                                                                                        |
|                                    | Pillows filled with zeolites to remove odors from coffins                                                                  |
| Medical applications               | Hemodialysis filters to remove ammonia, allowing the reuse of the saline solution in portable dialysis systems             |
|                                    | Athlete's foot treatment                                                                                                   |
|                                    | Reduction of recuperation time of wounds and surgical incisions                                                            |

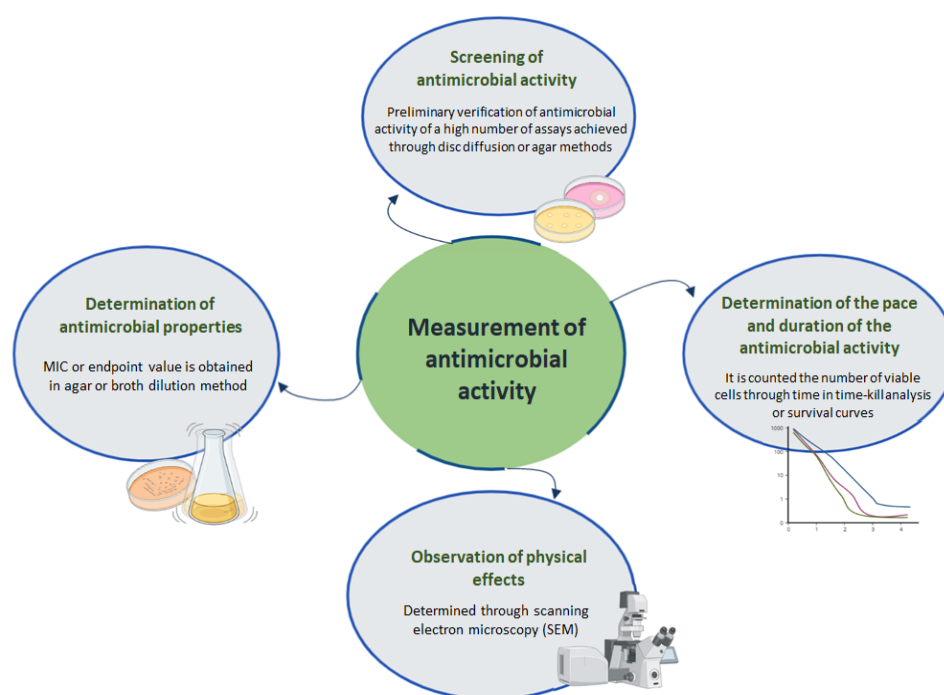

**Figure S2.** Methods used to determine antimicrobial activity of EO.

## References

1. Chouhan, S.; Sharma, K.; Guleria, S. Antimicrobial Activity of Some Essential Oils—Present Status and Future Perspectives. *Medicines* **2017**, *4*, 58.
2. Božik, M.; Císarová, M.; Tančinová, D.; Kouřimská, L.; Hleba, L.; Klouček, P. Selected Essential Oil Vapours Inhibit Growth of *Aspergillus* Spp. in Oats with Improved Consumer Acceptability. *Ind. Crops Prod.* **2017**, *98*, 146–152.
3. Martins, C.; Natal-da-Luz, T.; Sousa, J.P.; Gonçalves, M.J.; Salgueiro, L.; Canhoto, C. Effects of Essential Oils from *Eucalyptus Globulus* Leaves on Soil Organisms Involved in Leaf Degradation. *PLoS One* **2013**, *8*.
4. Samber, N.; Khan, A.; Varma, A.; Manzoor, N. Synergistic Anti-Candidal Activity and Mode of Action of *Mentha Piperita* Essential Oil and Its Major Components. *Pharm. Biol.* **2015**, *53*, 1496–1504.
5. Bassolé, I.H.N.; Juliani, H.R. Essential Oils in Combination and Their Antimicrobial Properties. *Molecules* **2012**, *17*, 3989–4006.
6. Stevic, T.; Beric, T.; Savikin, K.; Sokovic, M.; Godevac, D.; Dimkic, I.; Stankovic, S. Antifungal Activity of Selected Essential Oils against Fungi Isolated from Medicinal Plant. *Ind. Crops Prod.* **2014**, *55*, 116–122.
7. Pastor, J.; García, M.; Steinbauer, S.; Setzer, W.N.; Scull, R.; Gille, L.; Monzote, L. Combinations of Ascaridole, Carvacrol, and Caryophyllene Oxide against *Leishmania*. *Acta Trop.* **2015**, *145*, 31–38.
8. Requena, R.; Vargas, M.; Chiralt, A. Study of the Potential Synergistic Antibacterial Activity of Essential Oil Components Using the Thiazolyl Blue Tetrazolium Bromide (MTT) Assay. *Lwt - Food Sci. Technol.* **2019**, *101*, 183–190.
9. Kwiatkowski, P.; Mnichowska-Polanowska, M.; Pruss, A.; Masiuk, H.; Dzięcioł, M.; Giedrys-Kalemba, S.; Sienkiewicz, M. The Effect of Fennel Essential Oil in Combination with Antibiotics on *Staphylococcus Aureus* Strains Isolated from Carriers. *Burns* **2017**, *43*, 1544–1551.
10. Pereira, N.L.F.; Aquino, P.E.A.; Júnior, J.G.A.S.; Cristo, J.S.; Vieira Filho, M.A.; Moura, F.F.; Ferreira, N.M.N.; Silva, M.K.N.; Nascimento, E.M.; Correia, F.M.A.; et al. Antibacterial Activity and Antibiotic Modulating Potential of the Essential Oil Obtained from *Eugenia Jambolana* in Association with Led Lights. *J. Photochem. Photobiol. B Biol.* **2017**, *174*, 144–149.
11. Gallucci, N.; Casero, C.; Oliva, M.; Zygodlo, J.; Demo, M. Interaction between Terpenes and Penicillin on Bacterial Strains Resistant to Beta- Lactam Antibiotics. *J. Appl. Microbiol.* **2006**, *10*, 30–32.
12. Roana, J.; Mandras, N.; Scalas, D.; Campagna, P.; Tullio, V. Antifungal Activity of *Melaleuca Alternifolia* Essential Oil (TTO)

- and Its Synergy with Itraconazole or Ketoconazole against *Trichophyton Rubrum*. *Molecules* **2021**, *26*, 461.
13. Khan, M.S.A.; Ahmad, I.; Cameotra, S.S. Carum Copticum and Thymus Vulgaris Oils Inhibit Virulence in *Trichophyton Rubrum* and *Aspergillus Spp*. *Brazilian J. Microbiol.* **2014**, *45*, 523–531.
  14. Khan, M.S.A.; Ahmad, I. Antifungal Activity of Essential Oils and Their Synergy with Fluconazole against Drug-Resistant Strains of *Aspergillus Fumigatus* and *Trichophyton Rubrum*. *Appl. Microbiol. Biotechnol.* **2011**, *90*, 1083–1094.
  15. Pyun, M.S.; Shin, S. Antifungal Effects of the Volatile Oils from Allium Plants against *Trichophyton* Species and Synergism of the Oils with Ketoconazole. *Phytomedicine* **2006**, *13*, 394–400.
  16. Nafis, A.; Kasrati, A.; Jamali, C.A.; Custódio, L.; Vitalini, S.; Iriti, M.; Hassani, L. A Comparative Study of the in Vitro Antimicrobial and Synergistic Effect of Essential Oils from *Laurus Nobilis* L. and *Prunus Armeniaca* L. from Morocco with Antimicrobial Drugs: New Approach for Health Promoting Products. *Antibiotics* **2020**, *9*.
  17. Wińska, K.; Mączka, W.; Łyczko, J.; Grabarczyk, M.; Czubaszek, A.; Szumny, A. Essential Oils as Antimicrobial Agents—Myth or Real Alternative? *Molecules* **2019**, *24*, 1–21.
  18. McCusker, L.B.; Baerlocher, C. Zeolite Structures. In *Studies in Surface Science and Catalysis*; 2001; Vol. 137, pp. 37–67.
  19. Sels, B.; Kustov, L. *Zeolites and Zeolite-like Materials*; first edit.; Elsevier, 2016; ISBN 9780444635068.
  20. Derakhshankhah, H.; Jafari, S.; Sarvari, S.; Barzegari, E.; Moakedi, F.; Ghorbani, M.; Varnamkhasti, B.S.; Jaymand, M.; Izadi, Z.; Tayebi, L. Biomedical Applications of Zeolitic Nanoparticles, with an Emphasis on Medical Interventions. *Int. J. Nanomedicine* **2020**, *15*, 363–386.
  21. Mumpton, F.A. La Roca Magica: Uses of Natural Zeolites in Agriculture and Industry. *Proc. Natl. Acad. Sci. U. S. A.* **1999**, *96*, 3463–3470.
